# Supplementary material for: Current training on the basics of robotic surgery in the Netherlands: Time for a multidisciplinary approach?
Source: PubMed Central journal article supplement (PMC5216079; doi:10.1007/s00464-016-4970-2), 2016-05-18
Supplement: 464_2016_4970_MOESM1_ESM.pdf [file 464_2016_4970_MOESM1_ESM.pdf]

**1. What is your name?**

**2. What is your profession?**

**3. What is your age?**

**4. What is your gender?**

**5. Do you perform Robot assisted laparoscopic procedures?**

Yes/No

**6. Did you perform Robot assisted laparoscopic procedures in the past?**

Yes/No

**7. When did you start with Robot assisted laparoscopy?**

**8. Number of robot-assisted procedures performed**

**9. How many Robot assisted procedures do you perform a month?**

- 0-5 procedures
- 5-10 procedures
- 10-15 procedures
- 15-20 procedures
- 20-25 procedures
- 25-30 procedures
- 30-35 procedures
- >35 procedures

**10. Do you have conventional laparoscopic experience?**

Yes/No

**11. Number of conventional laparoscopic procedures performed?**

**12. How where you trained in robotic surgery?**

- By intuitive surgical with a proctor
- By my supervisor (master-apprentice learning)
- Fellowship
- Different .....

**13. What kind of robot training did you perform and how much time did you spend on the different parts?**

|                            | <5 h | 5-10 h | 10-20 h | 20-30 h | 30-40 h | 40-50 h | > 50 h |
|----------------------------|------|--------|---------|---------|---------|---------|--------|
| Knowledge training         |      |        |         |         |         |         |        |
| Video observations         |      |        |         |         |         |         |        |
| Live observations          |      |        |         |         |         |         |        |
| Table assisting            |      |        |         |         |         |         |        |
| Basic skills training      |      |        |         |         |         |         |        |
| Animal or cadaver training |      |        |         |         |         |         |        |
| Team training              |      |        |         |         |         |         |        |

**14. Did you take an exam before you started patient related work on the Da Vinci Robot?**

- Yes, knowledge exam
- Yes, Skills exam
- Yes, knowledge and skills
- No

**15. During how many procedures were you supervised (proctored)?**

**16. Did you use a duo console?**

Yes/No

**17. Do you personally teach robot assisted laparoscopy?**

(more answers possible)

- Yes, to colleagues
- Yes to residents
- Yes, to fellows
- Yes as intuitive proctor
- No

**18. How do you teach robot assisted laparoscopy?**

(more answers possible)

- Master apprentice without duo console
- Master apprentice with duo console
- Intuitive surgical training program
- Self initiated training program
- Different, ....

**19. Do you agree on setting a structured and obliged training program for basic robotic skills?**

Yes/No/No opinion

**20. Do you think an exam or test should be installed before starting robot-assisted surgery**

Yes/No/No opinion

**21. Do you have any other comment?**
